# Supplementary material for: A versatile approach to the fabrication of TiO2 nanostructures with reverse morphology and mesoporous Ag/TiO2 thin films via cooperative PS-b-PEO self-assembly and a sol-gel process
Source: Royal Society of Chemistry journal article supplement (doi:10.1039/b907922j), 2009-01-01
Supplement: b907922j.pdf [file b907922j.pdf]

## Supporting Information

### A Versatile Approach to the Fabrication of TiO<sub>2</sub> Nanostructures with Reverse Morphology and Mesoporous Ag/TiO<sub>2</sub> Thin Films via Cooperative PS-*b*-PEO Self-Assembly and a Sol-Gel Process

Min-Ah Cha,<sup>a</sup> Chang Hak Shin,<sup>b</sup> Dinakaran Kannaiyan,<sup>a</sup> Yoon Hee Jang,<sup>a</sup> Saji Thomas Kochuveedu,<sup>a</sup> Du Yeol Ryu,<sup>b\*</sup> and Dong Ha Kim<sup>a\*</sup>

<sup>a</sup>Department of Chemistry and Nano Science, Ewha Womans University, 11-1 Daehyun-Dong, Seodaemun-Gu, Seoul 120-750, Korea. Tel: +82-2-3277-4517; Fax: +82-2-3277-3419; E-mail: [dhkim@ewha.ac.kr](mailto:dhkim@ewha.ac.kr)

<sup>b</sup>Department of Chemical and Biomolecular Engineering, Yonsei University, 262 Seongsanno, Seodaemun-Gu, Seoul 120-749, Korea.

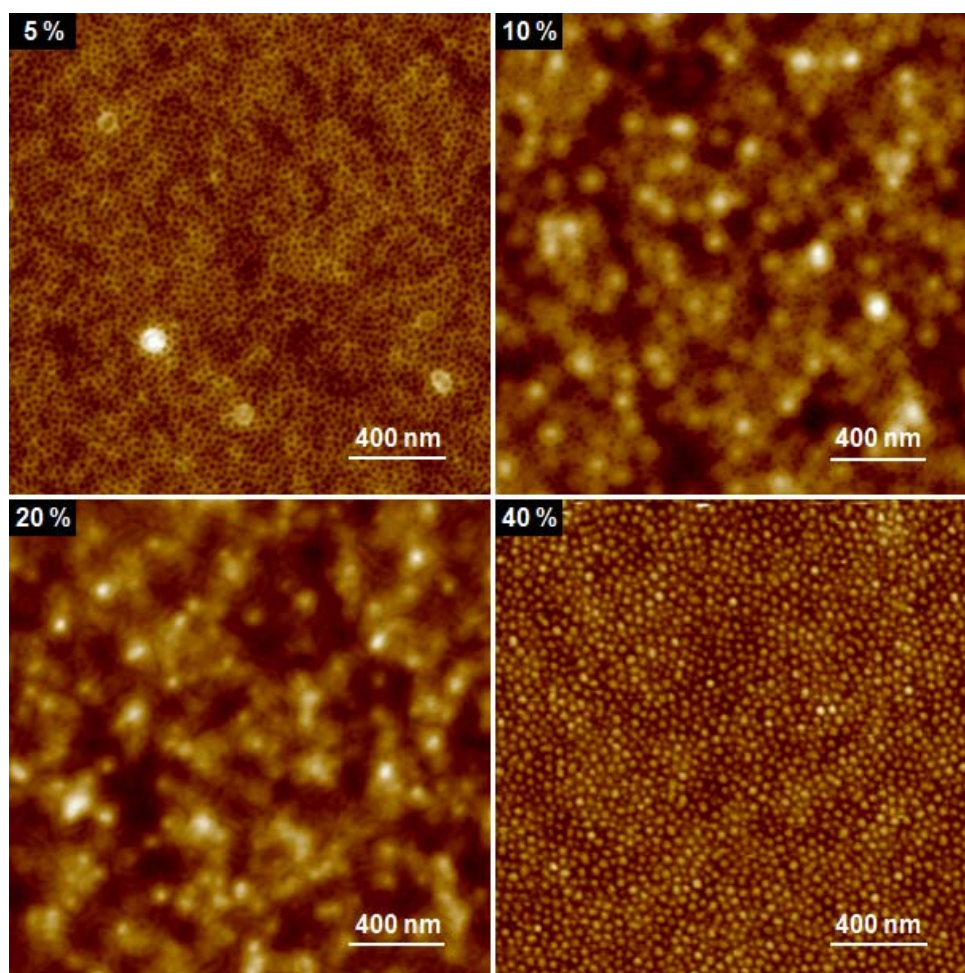

**Figure S1.** Height-contrast AFM images with different relative amount of TiO<sub>2</sub> sol-gel precursor: (a) 5 vol%, (b) 10 vol%, (c) 20 vol%, (d) 40 vol%. (Series I)

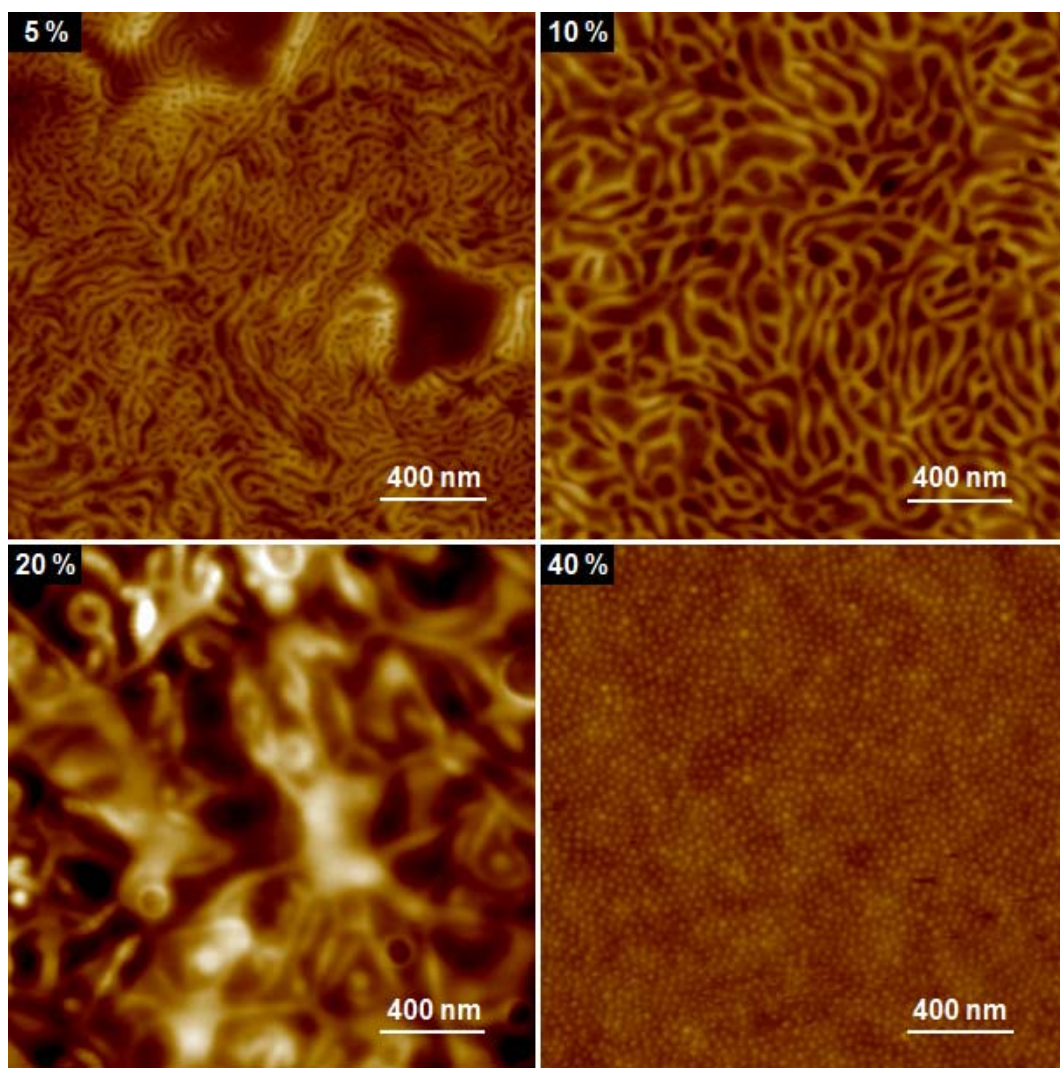

**Figure S2.** Height-contrast AFM images with different relative amount of TiO<sub>2</sub> sol-gel precursor: (a) 5 vol%, (b) 10 vol%, (c) 20 vol%, (d) 40 vol%. (Series II)

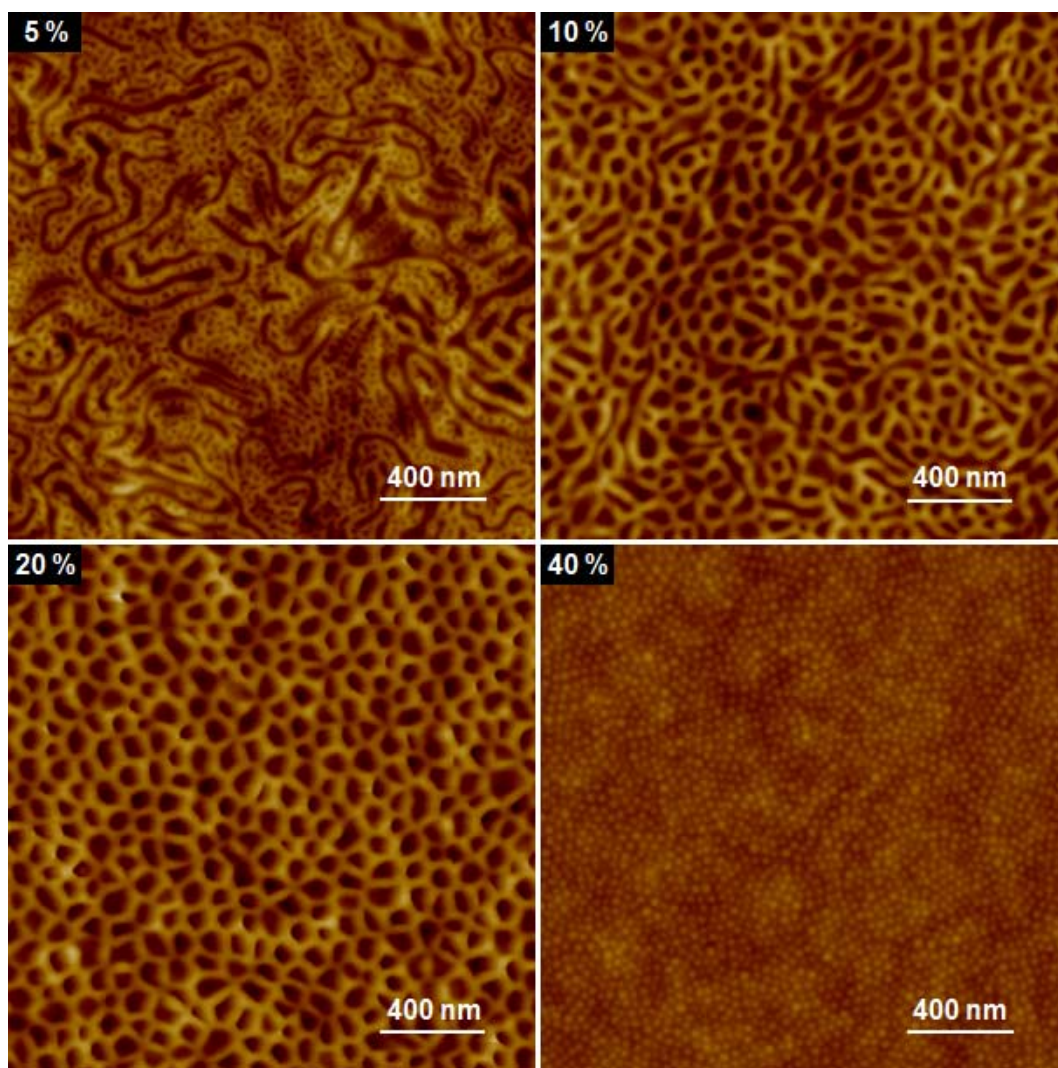

**Figure S3.** Height-contrast AFM images with different relative amount of TiO<sub>2</sub> sol-gel precursor: (a) 5 vol%, (b) 10 vol%, (c) 20 vol%, (d) 40 vol%. (Series III)
